# Supplementary material for: Janus transition metal dichalcogenides in combination with MoS2 for high-efficiency photovoltaic applications: a DFT study
Source: Royal Society of Chemistry journal article supplement (doi:10.1039/d2ra00775d), 2022-01-01
Supplement: d2ra00775d1.pdf [file d2ra00775d1.pdf]

### Supplementary information

#### **Janus transition metal dichalcogenides in combination with MoS<sub>2</sub> for high-efficiency photovoltaic applications**

Birhan Tesfaye [1] [2], K. O. Obodo[3][4], Georgies A. Asres [1]

[1] Center for Materials Engineering, Addis Ababa Institute of Technology, School of Multi-disciplinary Engineering, Addis Ababa, 1000, Ethiopia

[2] Center for dimensional metrology department, scientific metrology directorate, National Metrology Institute of Ethiopia, 5722, Addis Ababa, Ethiopia.

[3] HySA Infrastructure Centre of Competence, Faculty of Engineering, North-West University, South Africa (NWU), 2531, South Africa

[4] National Institute of Theoretical and Computational Sciences, Johannesburg 2000, South Africa

\* Corresponding author: Georgies Alene Asres

E-mail address: [georgies.alene@aait.edu.et](mailto:georgies.alene@aait.edu.et)

Table. S1 Optimal lattice parameters as well as other information (MoSSe\_MoS<sub>2</sub> Heterostructure)  
AAI

| Lattice constant (Å)<br>a= | unit-cell volume (a.u.) <sup>3</sup> | lattice parameter (alat)<br>a.u | the Fermi energy (ev) | hydrostatic pressure (kbar) | total energy (Ry) | Ecutwfc | Ecutrho | Total Dispersion Force | Total SCF correction |
|----------------------------|--------------------------------------|---------------------------------|-----------------------|-----------------------------|-------------------|---------|---------|------------------------|----------------------|
| 3.22                       | 1514.8826                            | 6.0849                          | 3.1541                | -3.86                       | -1328.984         | 90      | 560     | 0.003281               | 0.000386             |
| relax                      | 1514.8826                            | 6.0849                          | 3.1015                | 0.27                        | -1328.989         | 90      | 560     | 0.003225               | 0.000023             |

AAI-Se:

| Lattice constant (Å)<br>a= | unit-cell volume (a.u.) <sup>3</sup> | lattice parameter (alat)<br>a.u | the Fermi energy (ev) | hydrostatic pressure (kbar) | total energy (Ry) | Ecutwfc | Ecutrho | Total Dispersion Force | Total SCF correction |
|----------------------------|--------------------------------------|---------------------------------|-----------------------|-----------------------------|-------------------|---------|---------|------------------------|----------------------|
| 3.22                       | 1514.8826                            | 6.0849                          | 3.1541                | -3.86                       | -1328.984         | 90      | 560     | 0.003281               | 0.000386             |
| relax                      | 1514.8826                            | 6.0849                          | 3.1015                | 0.27                        | -1328.989         | 90      | 560     | 0.003225               | 0.000023             |

AAII:

| Lattice constant (Å)<br>a= | unit-cell volume (a.u.) <sup>3</sup> | lattice parameter (alat)<br>a.u | the Fermi energy (ev) | hydrostatic pressure (kbar) | total energy (Ry) | Ecutwfc | Ecutrho | Total Dispersion Force | Total SCF correction |
|----------------------------|--------------------------------------|---------------------------------|-----------------------|-----------------------------|-------------------|---------|---------|------------------------|----------------------|
| 3.22                       | 1514.8826                            | 6.0849                          | 3.7438                | 15.85                       | -1328.923         | 90      | 560     | 0.006867               | 0.000215             |
| relax                      | 1514.8826                            | 6.0849                          | 3.5387                | 0.32                        | -1328.992         | 90      | 560     | 0.004120               | 0.000020             |

AAII-Se:

| Lattice constant (Å)<br>a= | unit-cell volume (a.u.) <sup>3</sup> | lattice parameter (alat)<br>a.u | the Fermi energy (ev) | hydrostatic pressure (kbar) | total energy (Ry) | Ecutwfc | Ecutrho | Total Dispersion Force | Total SCF correction |
|----------------------------|--------------------------------------|---------------------------------|-----------------------|-----------------------------|-------------------|---------|---------|------------------------|----------------------|
| 3.22                       | 1514.882                             | 6.0849                          | 3.3540                | 2.58                        | -1328.97          | 90      | 560     | 0.006333               | 0.000332             |

|       |           |        |        |      |           |    |     |          |          |
|-------|-----------|--------|--------|------|-----------|----|-----|----------|----------|
|       | 6         |        |        |      | 3         |    |     |          |          |
| Relax | 1514.8826 | 6.0849 | 3.1369 | 0.24 | -1328.994 | 90 | 560 | 0.004170 | 0.000035 |

ABI:

| Lattice constant (Å)<br>a= | unit-cell volume (a.u.) <sup>3</sup> | lattice parameter (alat) a.u | the Fermi energy (ev) | hydrostatic pressure (kbar) | total energy (Ry) | Ecutwfc | Ecutrho | Total Dispersion Force | Total SCF correction |
|----------------------------|--------------------------------------|------------------------------|-----------------------|-----------------------------|-------------------|---------|---------|------------------------|----------------------|
| 3.24                       | 1533.7595                            | 6.1227                       | 3.8745                | 0.76                        | -1328.949         | 90      | 560     | 0.009543               | 0.000227             |
| Relax                      | 1533.7595                            | 6.1227                       | 3.4421                | -4.05                       | -1328.991         | 90      | 560     | 0.004060               | 0.000006             |

ABI-Se:

| Lattice constant (Å)<br>a= | unit-cell volume (a.u.) <sup>3</sup> | lattice parameter (alat) a.u | the Fermi energy (ev) | hydrostatic pressure (kbar) | total energy (Ry) | Ecutwfc | Ecutrho | Total Dispersion Force | Total SCF correction |
|----------------------------|--------------------------------------|------------------------------|-----------------------|-----------------------------|-------------------|---------|---------|------------------------|----------------------|
| 3.23                       | 1524.3065                            | 6.1038                       | 3.3136                | -2.63                       | -1328.978         | 90      | 560     | 0.005814               | 0.000439             |
| Relax                      | 1524.3065                            | 6.1038                       | 3.0787                | -1.82                       | -1328.993         | 90      | 560     | 0.004253               | 0.000027             |

ABII:

| Lattice constant (Å)<br>a= | unit-cell volume (a.u.) <sup>3</sup> | lattice parameter (alat) a.u | the Fermi energy (ev) | hydrostatic pressure (kbar) | total energy (Ry) | Ecutwfc | Ecutrho | Total Dispersion Force | Total SCF correction |
|----------------------------|--------------------------------------|------------------------------|-----------------------|-----------------------------|-------------------|---------|---------|------------------------|----------------------|
| 3.23                       | 1524.3065                            | 6.1038                       | 3.8269                | 6.17                        | -1328.946         | 90      | 560     | 0.007854               | 0.000138             |
| Relax                      | 1524.3065                            | 6.1038                       | 3.5171                | -1.81                       | -1328.992         | 90      | 560     | 0.004067               | 0.000011             |

ABII-Se:

| Lattice constant (Å)<br>a= | unit-cell volume (a.u.) <sup>3</sup> | lattice parameter (alat) a.u | the Fermi energy (ev) | hydrostatic pressure (kbar) | total energy (Ry) | Ecutwfc | Ecutrho | Total Dispersion Force | Total SCF correction |
|----------------------------|--------------------------------------|------------------------------|-----------------------|-----------------------------|-------------------|---------|---------|------------------------|----------------------|
|----------------------------|--------------------------------------|------------------------------|-----------------------|-----------------------------|-------------------|---------|---------|------------------------|----------------------|

|       |           |        |        |       |           |    |     |          |          |
|-------|-----------|--------|--------|-------|-----------|----|-----|----------|----------|
| 3.22  | 1514.8826 | 6.0849 | 3.0750 | -4.78 | -1328.984 | 90 | 560 | 0.004091 | 0.000299 |
| Relax | 1514.8826 | 6.0849 | 3.1545 | 0.84  | -1328.994 | 90 | 560 | 0.004120 | 0.000024 |

Table. S2 Optimal lattice parameters as well as other information (WSSe\_MoS<sub>2</sub> Heterostructure)

AAI:

| Lattice constant (A <sup>o</sup> )<br>a= | unit-cell volume (a.u.) <sup>3</sup> | lattice parameter (alat) a.u | the Fermi energy ( ev) | hydrostatic pressure (kbar) | total energy (Ry) | Ecutwfc | Ecutrho | Total Dispersion Force | Total SCF correction |
|------------------------------------------|--------------------------------------|------------------------------|------------------------|-----------------------------|-------------------|---------|---------|------------------------|----------------------|
| 3.22                                     | 1514.8826                            | 6.0849                       | 3.6647                 | -4.61                       | -1725.333         | 90      | 560     | 0.005128               | 0.000481             |
| relax                                    | 1514.8826                            | 6.0849                       | 3.5931                 | 0.58                        | -1725.337         | 90      | 560     | 0.005062               | 0.000065             |

AAI-Se:

| Lattice constant (A <sup>o</sup> )<br>a= | unit-cell volume (a.u.) <sup>3</sup> | lattice parameter (alat) a.u | the Fermi energy ( ev) | hydrostatic pressure (kbar) | total energy (Ry) | Ecutwfc | Ecutrho | Total Dispersion Force | Total SCF correction |
|------------------------------------------|--------------------------------------|------------------------------|------------------------|-----------------------------|-------------------|---------|---------|------------------------|----------------------|
| 3.22                                     | 1514.8826                            | 6.0849                       | 3.3524                 | -3.90                       | -1725.331         | 90      | 560     | 0.005265               | 0.000064             |
| relax                                    | 1514.8826                            | 6.0849                       | 3.2965                 | -0.34                       | -1725.338         | 90      | 560     | 0.004932               | 0.000054             |

AAII:

| Lattice constant (A <sup>o</sup> )<br>a= | unit-cell volume (a.u.) <sup>3</sup> | lattice parameter (alat) a.u | the Fermi energy ( ev) | hydrostatic pressure (kbar) | total energy (Ry) | Ecutwfc | Ecutrho | Total Dispersion Force | Total SCF correction |
|------------------------------------------|--------------------------------------|------------------------------|------------------------|-----------------------------|-------------------|---------|---------|------------------------|----------------------|
| 3.22                                     | 1514.8826                            | 6.0849                       | 3.9495                 | 15.45                       | -1725.276         | 90      | 560     | 0.008698               | 0.000311             |
| Relax                                    | 1514.8826                            | 6.0849                       | 3.7488                 | 0.96                        | -1725.343         | 90      | 560     | 0.006267               | 0.000034             |

AAII-Se:

| Lattice constant (A <sup>o</sup> )<br>a= | unit-cell volume (a.u.) <sup>3</sup> | lattice parameter (alat) a.u | the Fermi energy ( ev) | hydrostatic pressure (kbar) | total energy (Ry) | Ecutwfc | Ecutrho | Total Dispersion Force | Total SCF correction |
|------------------------------------------|--------------------------------------|------------------------------|------------------------|-----------------------------|-------------------|---------|---------|------------------------|----------------------|
| 3.22                                     | 1514.8826                            | 6.0849                       | 3.3740                 | -5.06                       | -1725.34          | 90      | 560     | 0.006242               | 0.000427             |

|       |           |        |        |      |           |  |  |          |          |
|-------|-----------|--------|--------|------|-----------|--|--|----------|----------|
|       | 6         |        |        |      | 0         |  |  |          |          |
| relax | 1514.8826 | 6.0849 | 3.3381 | 0.17 | -1725.344 |  |  | 0.006149 | 0.000044 |

ABI:

| Lattice constant (A°)<br>a= | unit-cell volume (a.u.) <sup>3</sup> | lattice parameter (alat)<br>a.u | the Fermi energy ( ev) | hydrostatic pressure (kbar) | total energy (Ry) | Ecutwfc | Ecutho | Total Dispersion Force | Total SCF correction |
|-----------------------------|--------------------------------------|---------------------------------|------------------------|-----------------------------|-------------------|---------|--------|------------------------|----------------------|
| 3.24                        | 1533.7595                            | 6.1227                          | 3.9650                 | 4.75                        | -1725.285         | 90      | 560    | 0.014114               | 0.000318             |
| Relax                       | 1533.7595                            | 6.1227                          | 3.9847                 | 24.94                       | -1725.318         | 90      | 560    | 0.011711               | 0.000146             |

ABI-Se

| Lattice constant (A°)<br>a= | unit-cell volume (a.u.) <sup>3</sup> | lattice parameter (alat)<br>a.u | the Fermi energy ( ev) | hydrostatic pressure (kbar) | total energy (Ry) | Ecutwfc | Ecutho | Total Dispersion Force | Total SCF correction |
|-----------------------------|--------------------------------------|---------------------------------|------------------------|-----------------------------|-------------------|---------|--------|------------------------|----------------------|
| 3.24                        | 1533.7595                            | 6.1227                          | 3.6072                 | -1.76                       | -1725.313         | 90      | 560    | 0.010838               | 0.000189             |
| relax                       | 1533.7595                            | 6.1227                          | 3.2248                 | -3.99                       | -1725.342         | 90      | 560    | 0.005931               | 0.000021             |

ABII:

| Lattice constant (A°)<br>a= | unit-cell volume (a.u.) <sup>3</sup> | lattice parameter (alat)<br>a.u | the Fermi energy ( ev) | hydrostatic pressure (kbar) | total energy (Ry) | Ecutwfc | Ecutho | Total Dispersion Force | Total SCF correction |
|-----------------------------|--------------------------------------|---------------------------------|------------------------|-----------------------------|-------------------|---------|--------|------------------------|----------------------|
| 3.23                        | 1524.3065                            | 6.1038                          | 4.0552                 | 7.13                        | -1725.293         | 90      | 560    | 0.009531               | 0.000118             |
| Relax                       | 1524.3065                            | 6.1038                          | 3.6658                 | -2.89                       | -1725.343         | 90      | 560    | 0.005988               | 0.000008             |

ABII-Se:

| Lattice constant (Ao)<br>a= | unit-cell volume (a.u.) <sup>3</sup> | attice parameter (alat)<br>a.u | the Fermi energy ( ev) | hydrostatic pressure (kbar) | total energy (Ry) | Ecutwfc | ECutho | Total Dispersion Force | Total SCF correction |
|-----------------------------|--------------------------------------|--------------------------------|------------------------|-----------------------------|-------------------|---------|--------|------------------------|----------------------|
| 3.23                        | 1524.3065                            | 6.1038                         | 3.4190                 | -5.94                       | -1725.336         | 90      | 560    | 0.008042               | 0.000122             |
| relax                       | 1524.3065                            | 6.1038                         | 3.3490                 | 0.44                        | -1725.344         | 90      | 560    | 0.006184               | 0.000031             |

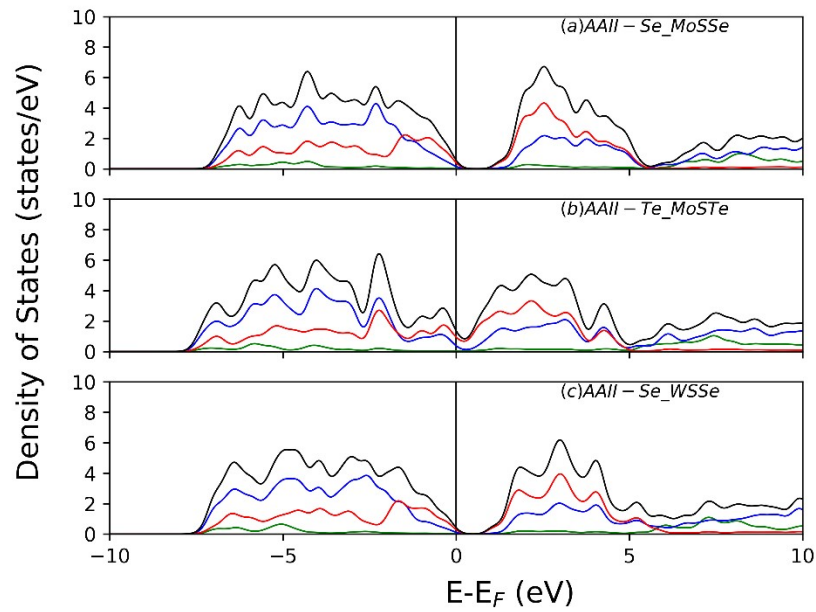

Figure S1: Density of state of the three heterostructures are presented. The green, blue, red and black line represents the s-orbital, p- orbital, d- orbital and sum of the orbitals.
